# Supplementary material for: Theaflavin-3,3′-Digallate from Black Tea Inhibits Neointima Formation Through Suppression of the PDGFRβ Pathway in Vascular Smooth Muscle Cells
Source: Frontiers journal article supplement (doi:10.3389/fphar.2022.861319), 2022-07-12
Supplement: Data_Sheet_1.pdf [file Data_Sheet_1.pdf]

## **Materials and Methods**

### **MTT cell viability assay**

To estimate the cell viability and proliferation, RASMCs were seeded onto 96-well plates (5000/well) and cultured in DMEM containing 10% FBS to near confluence. RASMCs were then cultured with FBS free DMEM for 48 h, and then treated with vehicle and different concentrations of TF3 (Shanghai Yuanye) from 5  $\mu$ M to 80  $\mu$ M for cell viability assay. Next, 50  $\mu$ L MTT solution was added to each well and incubated for another 4 h at 37°C. Then, the medium was removed and 150  $\mu$ L DMSO was added to each well. After shaking for 15 min, the absorbance was detected at 570 nm to determine the cell viability and rate of proliferation.

### **Supplementary Figure legends**

#### **Supplementary Fig. 1 Effect of TF3 on carotid artery ligation induced neointimal hyperplasia in mice 28 days after surgery.**

(A) TF3 (10 mg/kg) or Vehicle was intraperitoneally injected after carotid artery ligation. Mice were sacrificed 28 days after the surgery. H&E and Masson trichrome stained sections of all groups are shown. Scale bar, 50  $\mu$ m. (B) Quantification of the ratio of intima to media (I/M ratio), lumen diameter and lumen area. The data are presented as the means  $\pm$  SEM (n=6). \*\*\*p<0.001.

**Supplementary Fig. 2 Effect of TF3 on PCNA expression in carotid artery ligation induced neointimal hyperplasia in mice 28 days after surgery.** TF3 (10 mg/kg) or Vehicle was intraperitoneally injected after carotid artery ligation. Immunofluorescence staining of PCNA (red),  $\alpha$ -SMA (green) and DAPI (blue) were shown. Scale bar, 100  $\mu$ m.

**Supplementary Fig. 3 Effect of TF3 on the cell viability in RASMCs.** The cytotoxicity of TF3 in RASMCs. Cells were treated with 5  $\mu$ M, 10  $\mu$ M, 20  $\mu$ M, 40  $\mu$ M or 80  $\mu$ M TF3 for 48 h, the cell viability was measured by MTT assay. Each experiment was performed in triplicate.

**Supplementary Fig. 4 TF3 suppresses the activation of AKT and ERK1/2 during carotid artery ligation induced neointimal hyperplasia.**

TF3 (10 mg/kg) or vehicle was intraperitoneally injected after carotid artery ligation. (A) Immunofluorescence staining of T-AKT (red),  $\alpha$ -SMA (green) and DAPI (blue) (above) were shown. (B) Immunofluorescence staining of T-ERK (red),  $\alpha$ -SMA (green) and DAPI (Blue) (above) were shown. Scale bar, 100  $\mu$ m.

**Supplementary Fig. 5 TF3 suppresses the activation of PDGFR $\beta$  and its downstream pathways in PDGF-BB-induced mSMCs.**

The cells were serum-starved for 24 h and then stimulated with PDGF-BB (GenScript, Z03572, 20 ng/ml) with or without pretreatment with different concentrations of TF3. Cell extract was harvested after 10 min of stimulation. (A) Representative Western blot analysis of phosphorylated (p-) and total (t-) PDGFR $\beta$ , AKT and ERK1/2 expression. The statistical data of the western blot are shown. Each experiment was performed in triplicate. \*p < 0.05, \*\* p<0.01, \*\*\* p<0.001.
